# Supplementary material
Source: PubMed Central journal article supplement (PMC5118095)

**A** human mini-calpain-1 (2ARY)

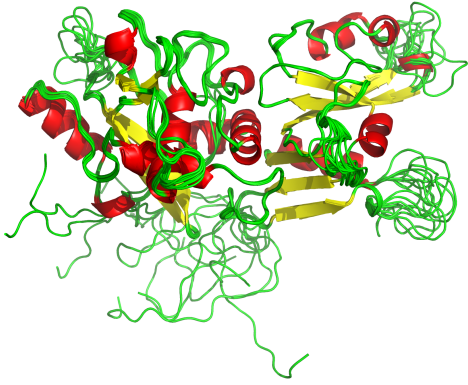

**B** human mini-calpain-9 (2P0R)

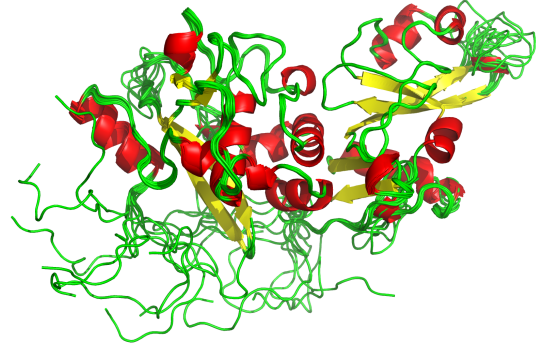

**C** human mini-calpain-8 (2NQA)

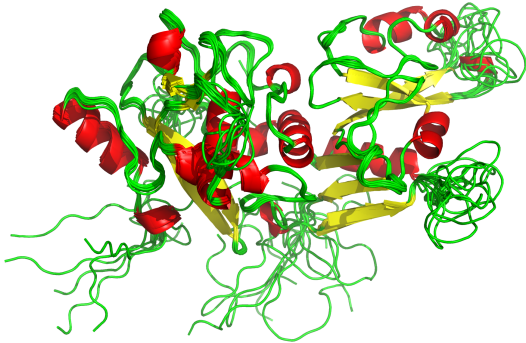

**D** rat mini-calpain-2 (3BOW)

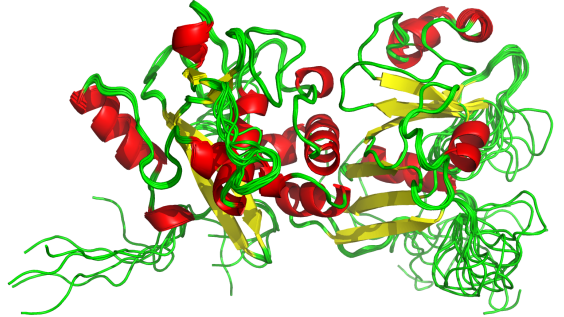

**E** rat mini-calpain-1-like (1QXP)

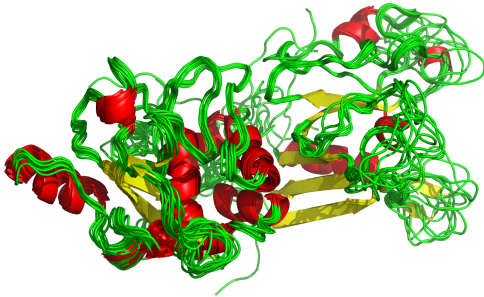

**F** rat mini-calpain-2 (1DF0)

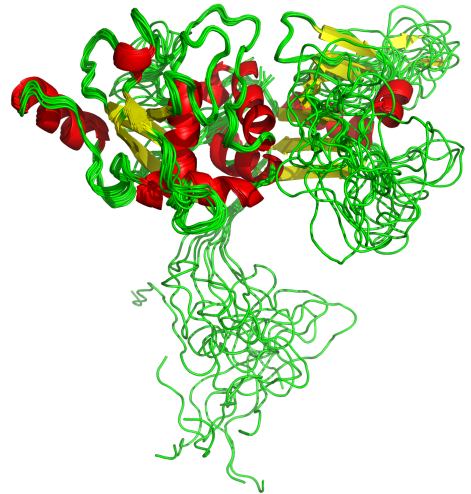

**G** human mini-calpain-9 (1ZIV)

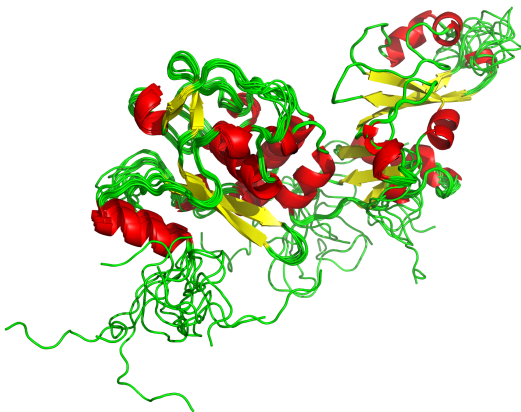

Supplement: NIHMS807190-supplement-2.pdf [file NIHMS807190-supplement-2.pdf]
