# Supplementary material
Source: PubMed Central journal article supplement (PMC5118095)

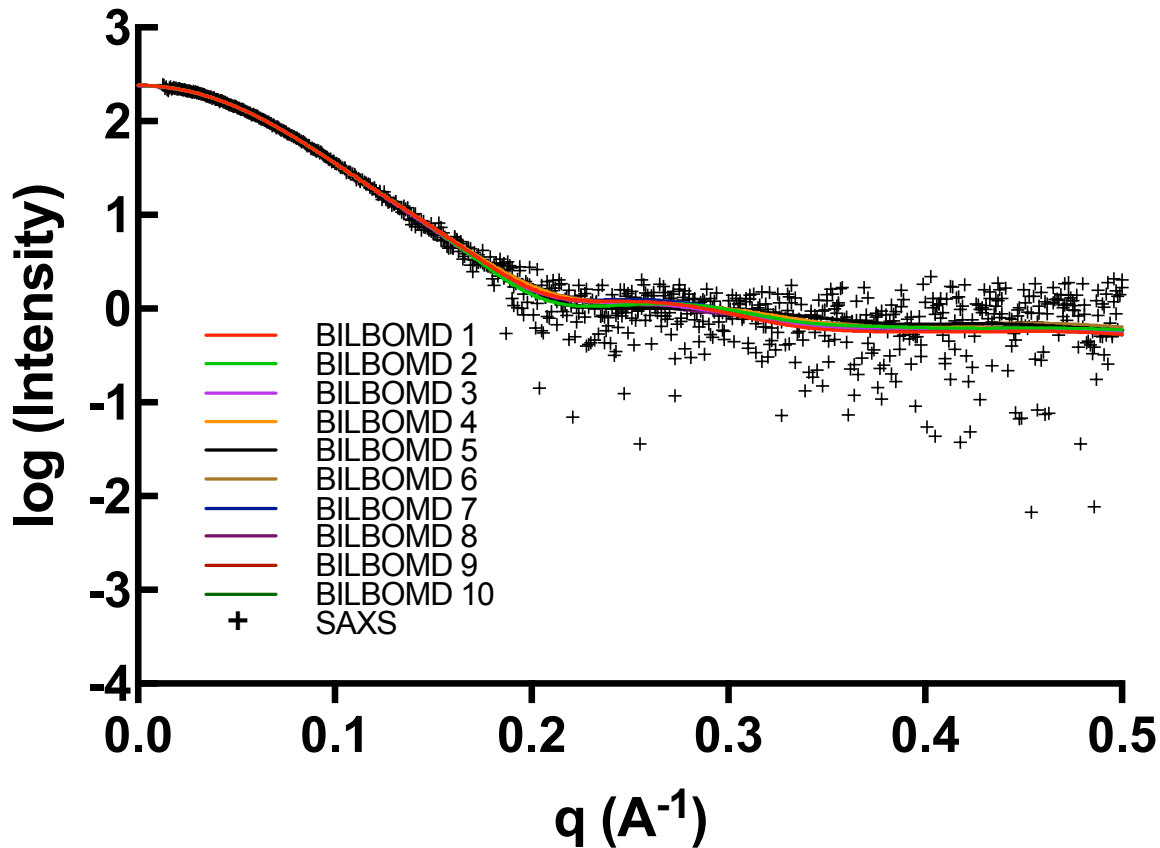

Supplement: NIHMS807190-supplement-3.pdf [file NIHMS807190-supplement-3.pdf]
